# Supplementary material
Source: publisher figshare collection journal article supplement (https://acs.figshare.com/ndownloader/files/4174504)
Supplement: Supplementary file 1 [file 4174504]

---

# **Electronic band structures of molybdenum and tungsten dichalcogenides by the *GW* approach**

Hong Jiang

Beijing National Laboratory for Molecular Sciences, State Key Laboratory of Rare Earth Material Chemistry and Application, Institute of Theoretical and Computational Chemistry, College of Chemistry and Molecular Engineering, Peking University, 100871 Beijing, China

**Supporting Information**

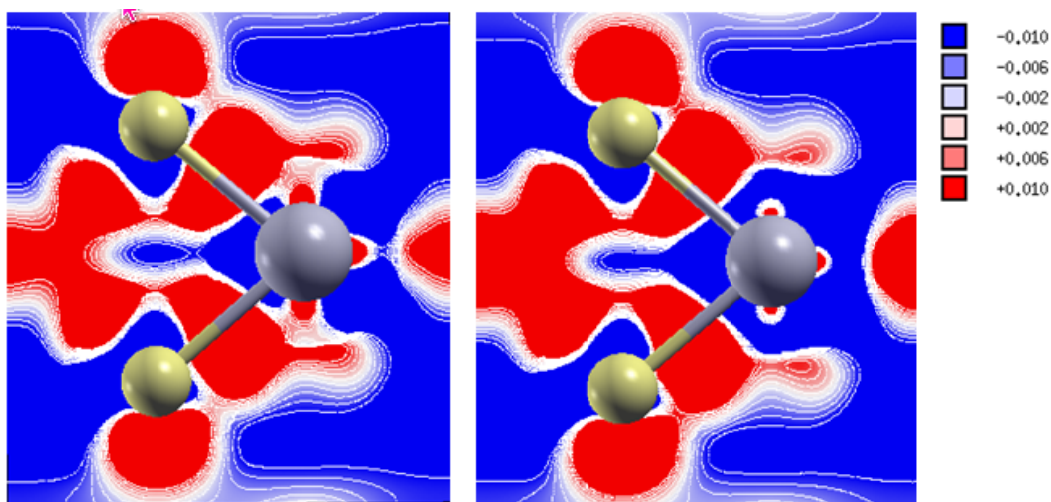

**Figure S1:** The 2D contour plot of electron density difference, i.e. the difference between the electron density of  $\text{MX}_2$  and the overlap of free-atom density, in  $\text{MoS}_2$  (Left) and  $\text{WS}_2$  (right). The big balls represent Mo or W atoms, and the small balls represent S atoms. Overall there is a strong depletion (accumulation) of electrons around M (X) atoms, and the charge transfer is more significant in  $\text{WS}_2$  than in  $\text{MoS}_2$ . Bader's atom-in-molecule analysis indicates that in  $\text{MoS}_2$ , Mo and S atoms have effective charges of 1.22 and -0.61, respectively, while in  $\text{WS}_2$ , W and S have effective charges of 1.37 and -0.68, implying that the chemical bonding in  $\text{WS}_2$  is more ionic than  $\text{MoS}_2$ .

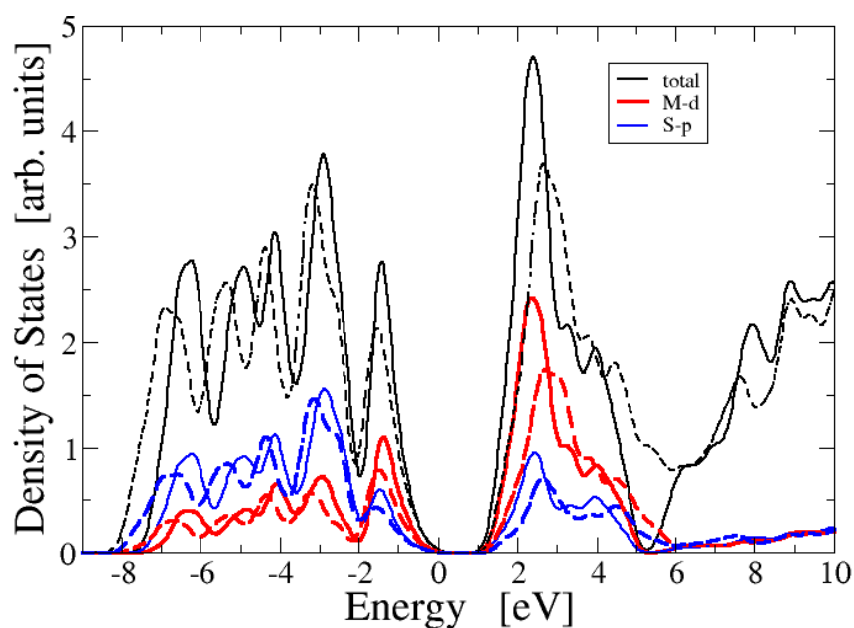

**Figure S2:** Comparison of the density of states of  $\text{MoS}_2$  (solid) and  $\text{WS}_2$  (dashed) from the GW calculations.

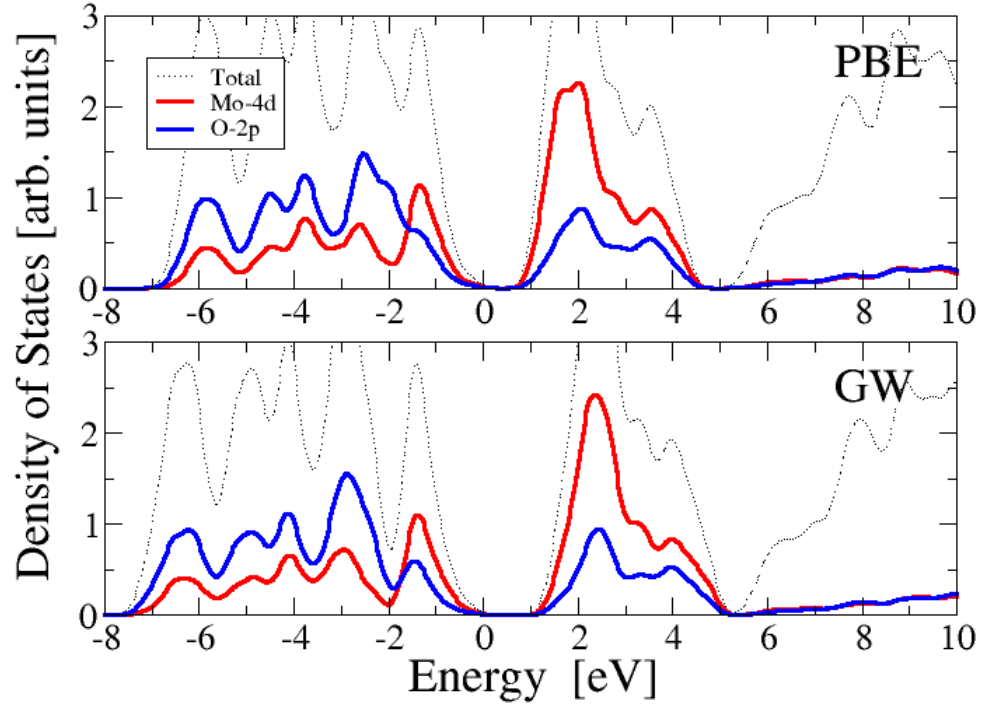

**Figure S3:** Comparison of projected density of states (PDOS) of MoS<sub>2</sub> obtained from PBE and GW calculations. Note that GW PDOS is calculated by using the GW quasi-particle energies but with PBE wave-functions.
